# Supplementary material for: Health-related quality of life assessment among people living with HIV in Rio de Janeiro, Brazil: a cross-sectional study
Source: Springer Nature journal article supplement (doi:10.1007/s11136-018-2044-8), 2018-11-10
Supplement: MOESM2 [file 16264106]

**Article title: “Health-related quality of life assessment among people living with HIV in Rio de Janeiro, Brazil: a cross-sectional study”**

**Author names: Rodolfo Castro, Raquel B. De Boni, Paula M. Luz, Luciane Velasque, Livia V. Lopes, Antonieta Medina-Lara, Sandra W. Cardoso, Marilia S. De Oliveira, Ruth K. Friedman, Beatriz Grinsztejn, Valdiléa G. Veloso**

**Affiliation and e-mail address of the corresponding author: Fundação Oswaldo Cruz, Instituto Nacional de Infectologia Evandro Chagas AND Universidade Federal do Estado do Rio de Janeiro, Instituto de Saúde Coletiva, rodolfoalcastro@gmail.com**

**Online Resource 2. Table with disaggregation by Gender Identity of outcomes and independent variables among 1480 PLWHA in Rio de Janeiro, Brazil.**

| **Factor** | **Level** | **MSM** | **Heterosexual Men** | **Women** | **Transgender Women** | **p-value** |
| --- | --- | --- | --- | --- | --- | --- |
| Number of individuals |  | 569 | 359 | 522 | 30 |  |
| Utility index with Brazilian value set, median (IQR) |  | 0.8 (0.7, 1.0) | 1.0 (0.7, 1.0) | 0.8 (0.7, 1.0) | 0.8 (0.7, 1.0) | <0.001 |
| Visual Analogue Scale of EQ-5D-3L, median (IQR) |  | 85.0 (75.0, 99.0) | 89.0 (70.0, 100.0) | 80.0 (70.0, 90.0) | 80.0 (50.0, 90.0) | 0.002 |
| Sex at birth | male | 569 (100.0%) | 359 (100.0%) | 0 (0.0%) | 30 (100.0%) | <0.001 |
|  | female | 0 (0.0%) | 0 (0.0%) | 522 (100.0%) | 0 (0.0%) |  |
| Age, median (IQR) |  | 38.0 (30.9, 48.2) | 45.4 (39.0, 53.4) | 44.9 (38.2, 52.9) | 42.1 (34.1, 46.2) | <0.001 |
| Years of Age | < 30 | 128 (22.5%) | 17 (4.7%) | 38 (7.3%) | 4 (13.3%) | <0.001 |
|  | 30-39 | 185 (32.5%) | 81 (22.6%) | 120 (23.0%) | 9 (30.0%) |  |
|  | 40-59 | 234 (41.1%) | 219 (61.0%) | 307 (58.8%) | 17 (56.7%) |  |
|  | > 60 | 22 (3.9%) | 42 (11.7%) | 57 (10.9%) | 0 (0.0%) |  |
| Self-reported Black or Mixed Skin Colour | no | 314 (55.2%) | 145 (40.4%) | 229 (43.9%) | 10 (33.3%) | <0.001 |
|  | yes | 252 (44.3%) | 212 (59.1%) | 291 (55.7%) | 19 (63.3%) |  |
|  | missing | 3 (0.5%) | 2 (0.6%) | 2 (0.4%) | 1 (3.3%) |  |
| Years of Study | no study | 0 (0.0%) | 7 (1.9%) | 16 (3.1%) | 2 (6.7%) | <0.001 |
|  | <9 | 78 (13.7%) | 149 (41.5%) | 234 (44.8%) | 12 (40.0%) |  |
|  | 9-12 | 250 (43.9%) | 153 (42.6%) | 198 (37.9%) | 11 (36.7%) |  |
|  | >12 | 234 (41.1%) | 46 (12.8%) | 67 (12.8%) | 4 (13.3%) |  |
|  | missing | 7 (1.2%) | 4 (1.1%) | 7 (1.3%) | 1 (3.3%) |  |
| Relationship status | engaged | 134 (23.6%) | 191 (53.2%) | 213 (40.8%) | 2 (6.7%) | <0.001 |
|  | not engaged | 433 (76.1%) | 166 (46.2%) | 308 (59.0%) | 28 (93.3%) |  |
|  | missing | 2 (0.4%) | 2 (0.6%) | 1 (0.2%) | 0 (0.0%) |  |
| Sexual Abstinence | no | 494 (86.8%) | 309 (86.1%) | 373 (71.5%) | 29 (96.7%) | <0.001 |
|  | yes | 74 (13.0%) | 50 (13.9%) | 147 (28.2%) | 1 (3.3%) |  |
|  | missing | 1 (0.2%) | 0 (0.0%) | 2 (0.4%) | 0 (0.0%) |  |
| Sexual Compulsivity (SCS) | no | 548 (96.3%) | 351 (97.8%) | 511 (97.9%) | 28 (93.3%) | 0.048 |
|  | yes | 15 (2.6%) | 5 (1.4%) | 3 (0.6%) | 1 (3.3%) |  |
|  | missing | 6 (1.1%) | 3 (0.8%) | 8 (1.5%) | 1 (3.3%) |  |
| Intimate Partner Violence | no | 500 (87.9%) | 327 (91.1%) | 428 (82.0%) | 22 (73.3%) | <0.001 |
|  | yes | 65 (11.4%) | 27 (7.5%) | 94 (18.0%) | 8 (26.7%) |  |
|  | missing | 4 (0.7%) | 5 (1.4%) | 0 (0.0%) | 0 (0.0%) |  |
| Depression screening (PHQ-2) | negative | 455 (80.0%) | 303 (84.4%) | 383 (73.4%) | 18 (60.0%) | <0.001 |
|  | positive | 112 (19.7%) | 56 (15.6%) | 135 (25.9%) | 12 (40.0%) |  |
|  | missing | 2 (0.4%) | 0 (0.0%) | 4 (0.8%) | 0 (0.0%) |  |
| Alcohol use in the last 3 months | no | 336 (59.1%) | 238 (66.3%) | 385 (73.8%) | 12 (40.0%) | <0.001 |
|  | yes | 233 (40.9%) | 121 (33.7%) | 137 (26.2%) | 17 (56.7%) |  |
|  | missing | 0 (0.0%) | 0 (0.0%) | 0 (0.0%) | 1 (3.3%) |  |
| Tobacco use in the last 3 months | no | 419 (73.6%) | 289 (80.5%) | 442 (84.7%) | 19 (63.3%) | <0.001 |
|  | yes | 150 (26.4%) | 70 (19.5%) | 80 (15.3%) | 11 (36.7%) |  |
| Polysubstance use in the last 3 months | no | 545 (95.8%) | 352 (98.1%) | 519 (99.4%) | 27 (90.0%) | <0.001 |
|  | yes | 22 (3.9%) | 7 (1.9%) | 3 (0.6%) | 3 (10.0%) |  |
|  | missing | 2 (0.4%) | 0 (0.0%) | 0 (0.0%) | 0 (0.0%) |  |
| Years since HIV diagnosis | < 1 | 41 (7.2%) | 13 (3.6%) | 9 (1.7%) | 3 (10.0%) | <0.001 |
|  | 1-10 | 335 (58.9%) | 220 (61.3%) | 253 (48.5%) | 19 (63.3%) |  |
|  | > 10 | 193 (33.9%) | 126 (35.1%) | 260 (49.8%) | 8 (26.7%) |  |
| Years enrolled in HIV Cohort | < 1 | 62 (10.9%) | 24 (6.7%) | 17 (3.3%) | 5 (16.7%) | <0.001 |
|  | 1-3 | 124 (21.8%) | 52 (14.5%) | 64 (12.3%) | 6 (20.0%) |  |
|  | >3 | 383 (67.3%) | 283 (78.8%) | 441 (84.5%) | 19 (63.3%) |  |
| Years on ART | naive | 28 (4.9%) | 14 (3.9%) | 18 (3.4%) | 2 (6.7%) | <0.001 |
|  | < 1 | 61 (10.7%) | 19 (5.3%) | 23 (4.4%) | 3 (10.0%) |  |
|  | 1-3 | 145 (25.5%) | 54 (15.0%) | 74 (14.2%) | 8 (26.7%) |  |
|  | >3 | 335 (58.9%) | 272 (75.8%) | 407 (78.0%) | 17 (56.7%) |  |
| CD4 nadir, median (IQR) |  | 233.0 (96.0, 360.0) | 133.0 (49.0, 265.0) | 197.5 (79.0, 307.0) | 205.0 (70.0, 275.0) | <0.001 |
| CD4 | < 200 | 34 (6.0%) | 38 (10.6%) | 43 (8.2%) | 3 (10.0%) | <0.001 |
|  | 200-500 | 151 (26.5%) | 125 (34.8%) | 115 (22.0%) | 12 (40.0%) |  |
|  | > 500 | 347 (61.0%) | 171 (47.6%) | 325 (62.3%) | 11 (36.7%) |  |
|  | missing | 37 (6.5%) | 25 (7.0%) | 39 (7.5%) | 4 (13.3%) |  |
| HIV Viral load | < 50 | 419 (73.6%) | 244 (68.0%) | 345 (66.1%) | 17 (56.7%) | 0.030 |
|  | >= 50 | 126 (22.1%) | 96 (26.7%) | 153 (29.3%) | 9 (30.0%) |  |
|  | missing | 24 (4.2%) | 19 (5.3%) | 24 (4.6%) | 4 (13.3%) |  |

Significance tests were performed to compare each characteristic between groups. Numeric variables were compared using the Wilcoxon rank-sum (2 groups) or Kruskal-Wallis (>2 groups) test, and categorical variables were compared using Pearson's chi-squared.
